# Supplementary material
Source: PubMed Central journal article supplement (PMC6669903)
Supplement: NIHMS1528766-supplement-1.pdf [file NIHMS1528766-supplement-1.pdf]

Fig. S1. Saneyoshi et al.

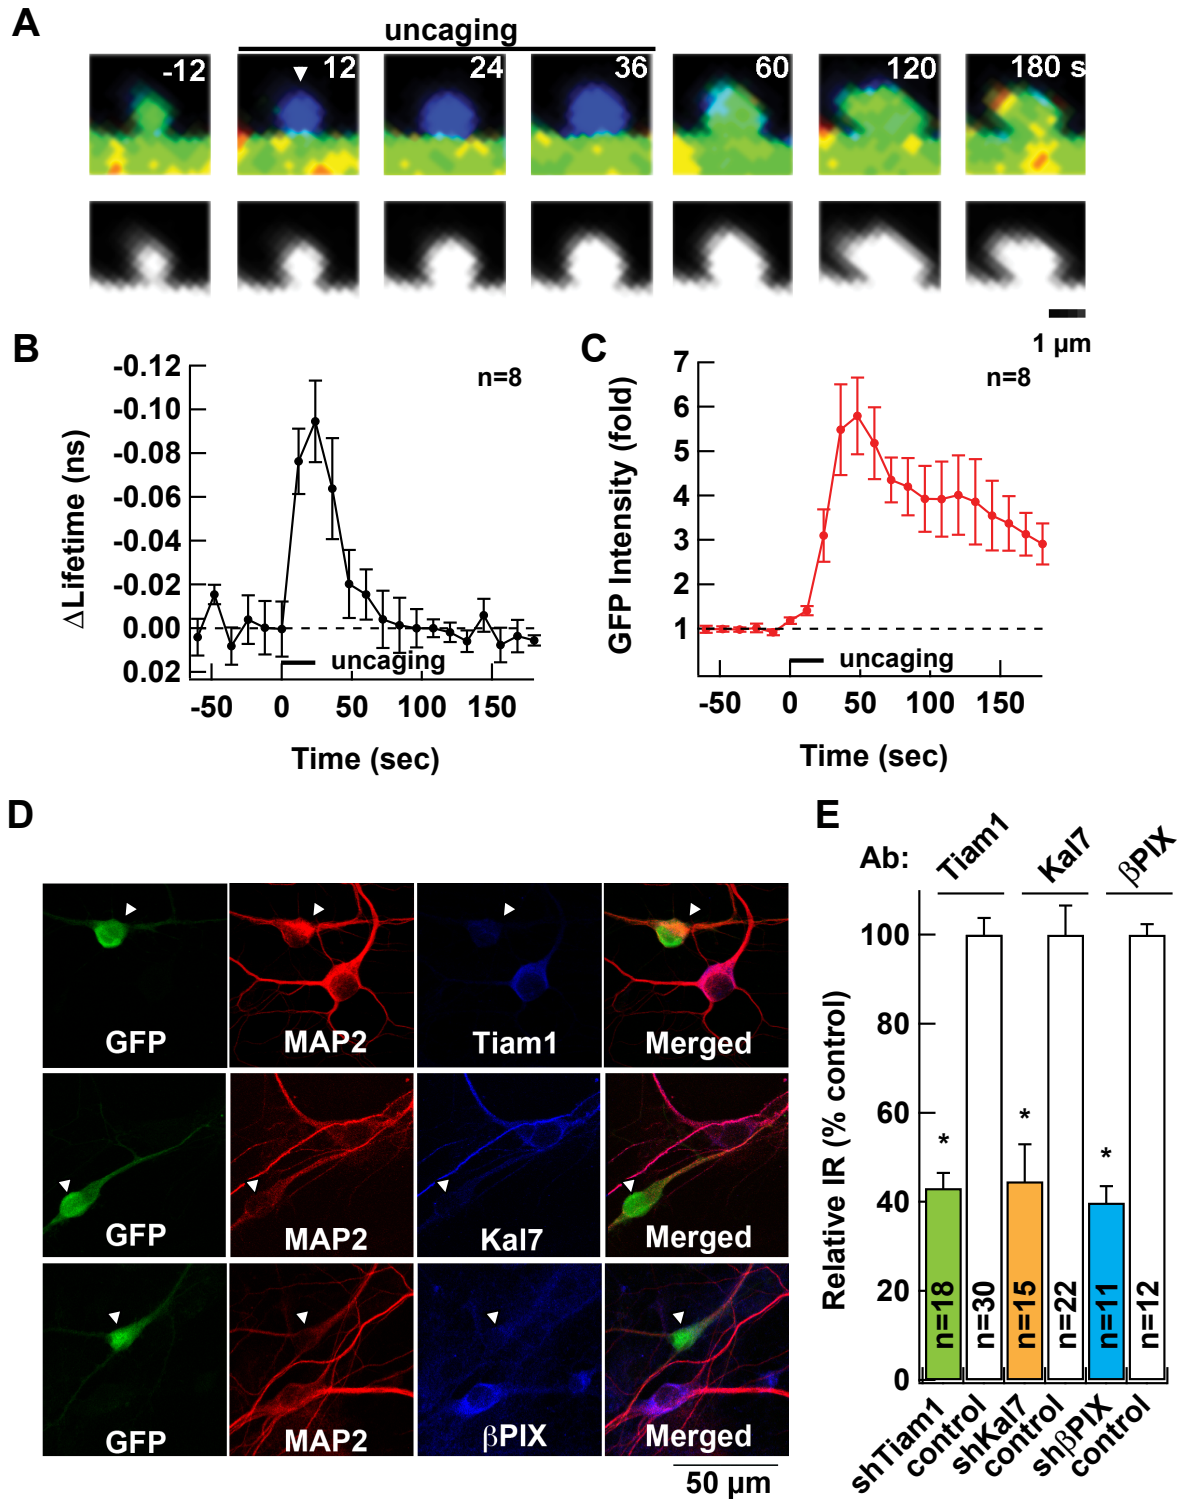

3 **Figure S1, related to Figures 1 and 2. Activation of CaMKII during sLTP is transient in**  
4 **hippocampal organotypic slice culture and efficacy of shRNA against the RacGEF.**

5 A. Activation of CaMKII as visualized by FRET-FLIM-based CaMKII activity sensor, Camui,  
6 during sLTP. CaMKII activity and distribution of Camui sensor, as a proxy of structure, are shown.  
7 Cooler colour hues in FLIM images indicates higher CaMKII activity.

8 B, C. Summary of CaMKII activity (B) and volume of the spine (C).

9 D, E. Test of efficiency of shRNA against the RacGEFs. Hippocampal dissociated neurons were  
10 transfected with GFP and shRNA construct against Tiam1, Kalirin-7 (Kal7), or  $\beta$ PIX. Four days  
11 after transfection, neurons were fixed and stained with antibodies against RacGEFs (Tiam1, Kal7,  
12 or  $\beta$ PIX), MAP2, and Hoechst 33342 (D). Arrow heads indicate GFP positive cells. Quantification  
13 of RacGEF protein in shRNA expressing neuron (E). Immunoreactivities (IR) were compared with  
14 a GFP positive neuron and its neighbor cell: both cells were MAP2 positive. Relative IR were  
15 normalized to MAP2 positive/GFP negative cells as 100% (control). \*,  $p < 0.05$ , compared to  
16 control; *t*-test.

17 Data are represented as mean  $\pm$  SEM (B, C, E).

**A**

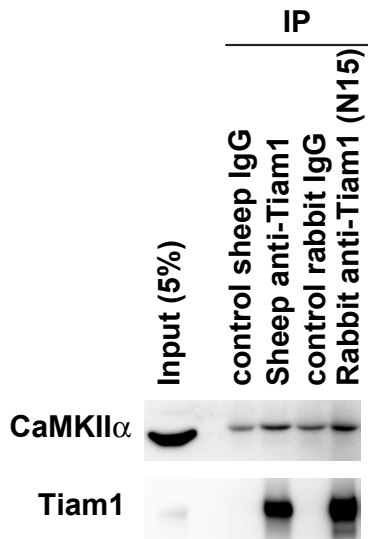

**B**

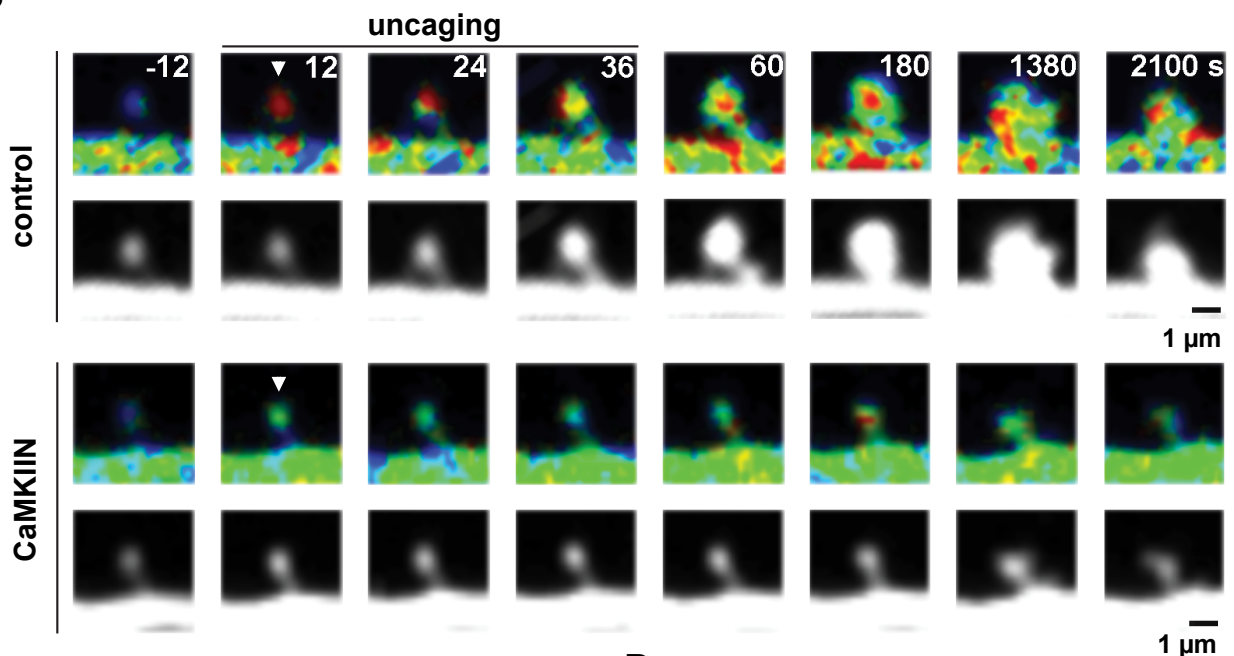

**C**

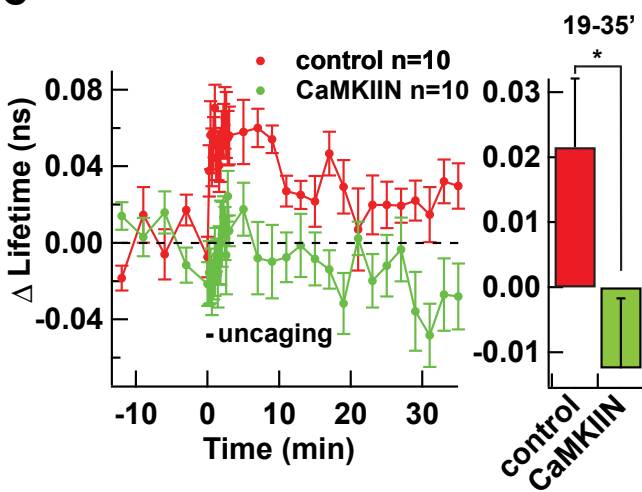

**D**

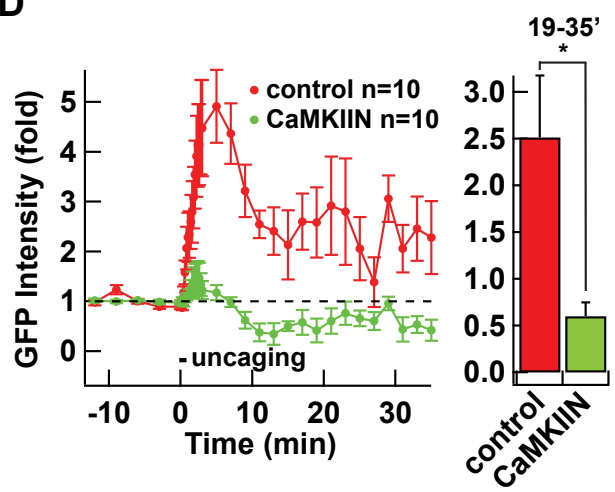

19 **Figure S2, related to Figure 3. Interaction between Tiam1 and CaMKII and effect of**  
20 **CaMKIIN overexpression**

21 A. Co-immunoprecipitation between Tiam1 and CaMKII from brain tissue. Whole brain lysate was  
22 immunoprecipitated with control IgG (Sheep or Rabbit) or anti-Tiam1 antibodies and protein-G  
23 sepharose. After extensive wash, immunoprecipitated proteins (IP) were eluted with SDS-PAGE  
24 sample buffer, and then subjected to western blotting using Tiam1 and CaMKII antibodies.

25 B. Representative images of the interaction between Tiam1 and CaMKII with or without CaMKIIN  
26 overexpression. Other conventions are similar to Fig. 1.

27 C, D. Summary of FRET change (C) and volume (D) from multiple spines. \*,  $p < 0.05$ , compared to  
28 control; *t*-test. Data are represented as mean  $\pm$  SEM.

29

Fig. S3. Saneyoshi et al.

**A**

|                               |                                                                                                                                                |
|-------------------------------|------------------------------------------------------------------------------------------------------------------------------------------------|
| <i>Gallus gallus</i>          | DRSRPAM <b>D</b> THAS <b>R</b> MT <b>Q</b> L <b>K</b> K <b>Q</b> AAL <b>T</b> GINGD <b>V</b> EGHG                                              |
| <i>Equus caballus</i>         | ERGRK <b>T</b> L <b>D</b> SHAS <b>R</b> MT <b>Q</b> L <b>K</b> K <b>Q</b> AAL <b>S</b> GINGG <b>L</b> ESTS                                     |
| <i>Canis lupus familiaris</i> | ERRRAL <b>D</b> SHAS <b>R</b> MT <b>Q</b> L <b>K</b> K <b>Q</b> AAL <b>S</b> GINGG <b>L</b> ESPG                                               |
| <i>Mus musculus</i>           | ARGRR <b>T</b> L <b>D</b> SHAS <b>R</b> MT <b>Q</b> L <b>K</b> K <b>Q</b> AAL <b>S</b> GINGG <b>L</b> ESAS                                     |
| <i>Homo sapiens</i>           | ERGRK <b>T</b> L <b>D</b> SHAS <b>R</b> MA <b>Q</b> L <b>K</b> K <b>Q</b> AAL <b>S</b> GINGG <b>L</b> ESAS                                     |
| <i>Oryctolagus cuniculus</i>  | ERGRR <b>T</b> L <b>D</b> SHAS <b>R</b> MA <b>Q</b> L <b>K</b> K <b>Q</b> AAL <b>S</b> GG <b>S</b> GG <b>L</b> ESAS                            |
| <i>Anolis carolinensis</i>    | ERARY <b>T</b> GG <b>T</b> H <b>V</b> S <b>R</b> MA <b>Q</b> L <b>K</b> K <b>Q</b> AAL <b>P</b> GINGG <b>M</b> EGNS                            |
| <i>Xenopus tropicalis</i>     | TKVQ <b>N</b> TM <b>N</b> T <b>H</b> AS <b>R</b> MA <b>Q</b> L <b>K</b> K <b>Q</b> T <b>A</b> F <b>S</b> GM <b>N</b> GS <b>I</b> ES <b>N</b> T |
|                               | : : : . : * . * * * : * * * * : * : * . * : * .                                                                                                |

**B**

|          |                                                                                                             |
|----------|-------------------------------------------------------------------------------------------------------------|
| Tiam1    | <b>R</b> TL <b>D</b> SHAS <b>R</b> MA <b>Q</b> L <b>K</b> K <b>Q</b> AAL <b>S</b> GIN                       |
| CaMKIIN1 | <b>K</b> R <b>P</b> P <b>K</b> L <b>G</b> Q <b>I</b> G <b>R</b> S <b>K</b> R <b>V</b> V <b>I</b> E <b>D</b> |
| AIP      | <b>K</b> K <b>A</b> L <b>R</b> R <b>Q</b> E <b>A</b> V <b>D</b> A <b>L</b>                                  |

**C**

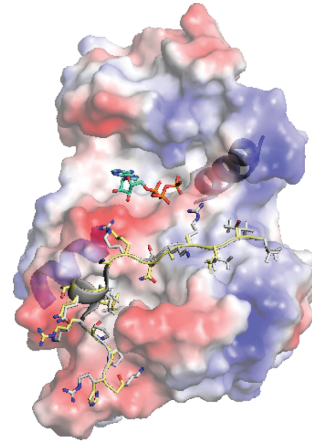

**D**

Tiam1 (predicted)

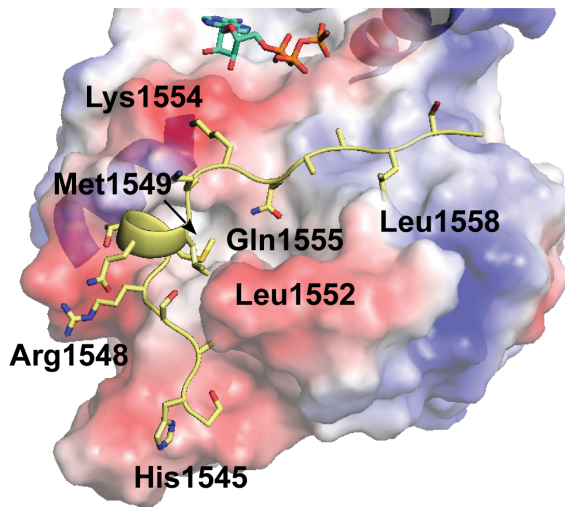

**E**

CaMKIIN1

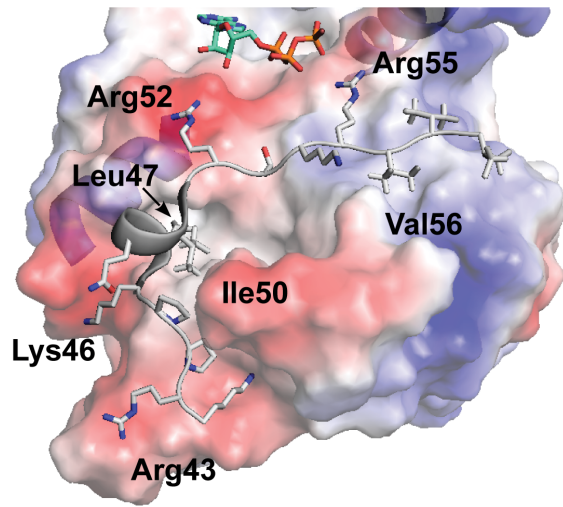

**F**

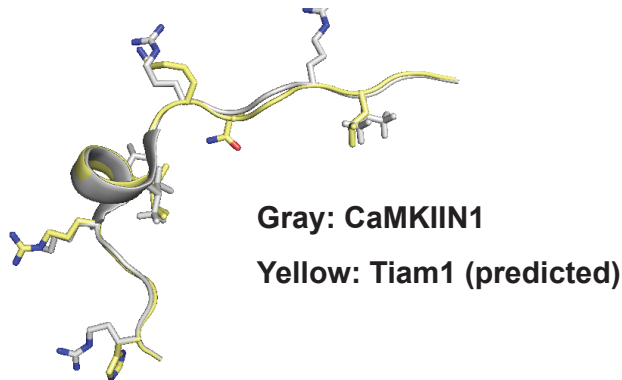

31 **Figure S3, related to Figure 4. CBD of Tiam1 is conserved among vertebrate species, and a**  
32 **structural model of RAKEC formed between CaMKII and Tiam1.**

33 A. Cross-species homology comparison of the CBD of Tiam1. Alignment was made by ClustalW  
34 program. The following information were used: *Gallus gallus*, XP\_416699; *Equus caballus*,  
35 XP\_001498883, *Canis lupus familiaris*, XP\_544855; *Mus musculus*, NM\_009384.3; *Homo sapiens*,  
36 NM\_003253.2; *Oryctolagus cuniculus*, XP\_002716851; *Anolis carolinensis*, XP\_003219107;  
37 *Xenopus Tropicalis*, XP\_002938487.

38 B. A comparison of the CBD of Tiam1 and CaMKIIN1. The sequence in CaMKIIN1 important for  
39 binding, as determined by alanine scanning, is underlined (Coultrap and Bayer, 2011). Those  
40 residues that are particularly important are double-underlined. Consensus sequence  
41 (L/I)(K/R/H)(K/R)QXXΦ is in red and basic residues outside of the consensus sequence are in blue.

42 C-F. Prediction of binding between Tiam1 and CaMKII based on the X-ray crystallographic data of  
43 interaction between CaMKIIN1 and CaMKII (C) (Chao et al., 2010). Higher magnification of  
44 Tiam1/CaMKII interaction and the residues implicated in the binding are in D. CaMKIIN1/CaMKII  
45 interaction based on the original crystallographic data (E). Overlay of Tiam1 and CaMKIIN1 are  
46 shown (F).

47

48

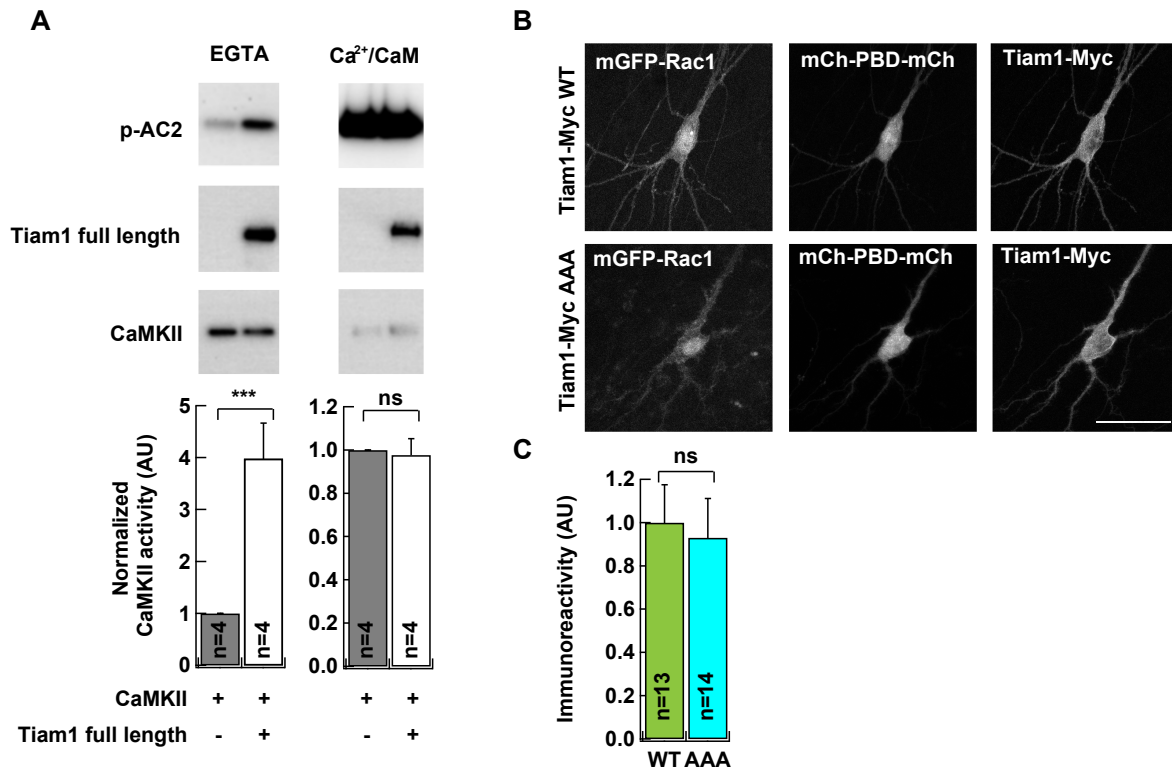

49  
 50 **Figure S4, related to Figures 5 and 6. Binding with full length Tiam1 protein generates**  
 51 **autonomous kinase activity of CaMKII and expression of WT and AAA Tiam1 rescue**  
 52 **construct in neurons of hippocampal slice culture.**

53 A. *In vitro* kinase assay of full length Tiam1-bound CaMKII using GST-AC2 as a substrate.

54 CaMKII and Tiam1 were affinity-purified with a Flag antibody from HEK293T cells expressing  
 55 Flag-tagged CaMKII or Tiam1. CaMKII was incubated with Tiam1 in the presence of  
 56 Ca<sup>2+</sup>/calmodulin to form a complex. Then EGTA was added to chelate Ca<sup>2+</sup>. ATP was omitted  
 57 in these steps to avoid autophosphorylation. Subsequently, the *in vitro* phosphorylation reaction  
 58 was initiated by adding ATP in the absence (EGTA) or presence of Ca<sup>2+</sup>/calmodulin  
 59 (Ca<sup>2+</sup>/CaM) using purified GST-AC2 as a substrate. The reaction products were subjected to  
 60 western blotting with antibodies against phosphorylated-AKT substrate to detect phosphorylated  
 61 AC2, Tiam1, and CaMKII. CaMKII bands in Ca<sup>2+</sup>/CaM were shifted due to auto-

62 phosphorylation. Band intensities were measured and normalized to CaMKII without Tiam1 as  
63 one. ns, not significant; \*\*\*,  $p < 0.01$ , compared to CaMKII without Tiam1; *t*-test.

64 B. Representative images of neurons expressing shRNA against Tiam1, GFP-Rac1, mCherry-  
65 Pak1-mCherry, and shRNA resistant Tiam1 WT or AAA. Neurons in hippocampal organotypic  
66 slice culture were transfected with shRNA against Tiam1, GFP-Rac1, mCherry-Pak1-mCherry,  
67 and Myc-tagged shRNA resistant Tiam1 WT or AAA. Four days after transfection, slices were  
68 fixed, and stained with Myc antibody. Scale, 50  $\mu$ m.

69 C. Quantification of Tiam1 rescue proteins in hippocampal organotypic slice culture.

70 Immunoreactivities (IR) of Myc antibody were quantified in GFP and mCherry positive  
71 neurons. Relative IR was normalized to WT as one. ns, not significant; *t*-test.

72 Data are represented as mean  $\pm$  SEM (A, C).

73



Fig. S5. Saneyoshi et al.

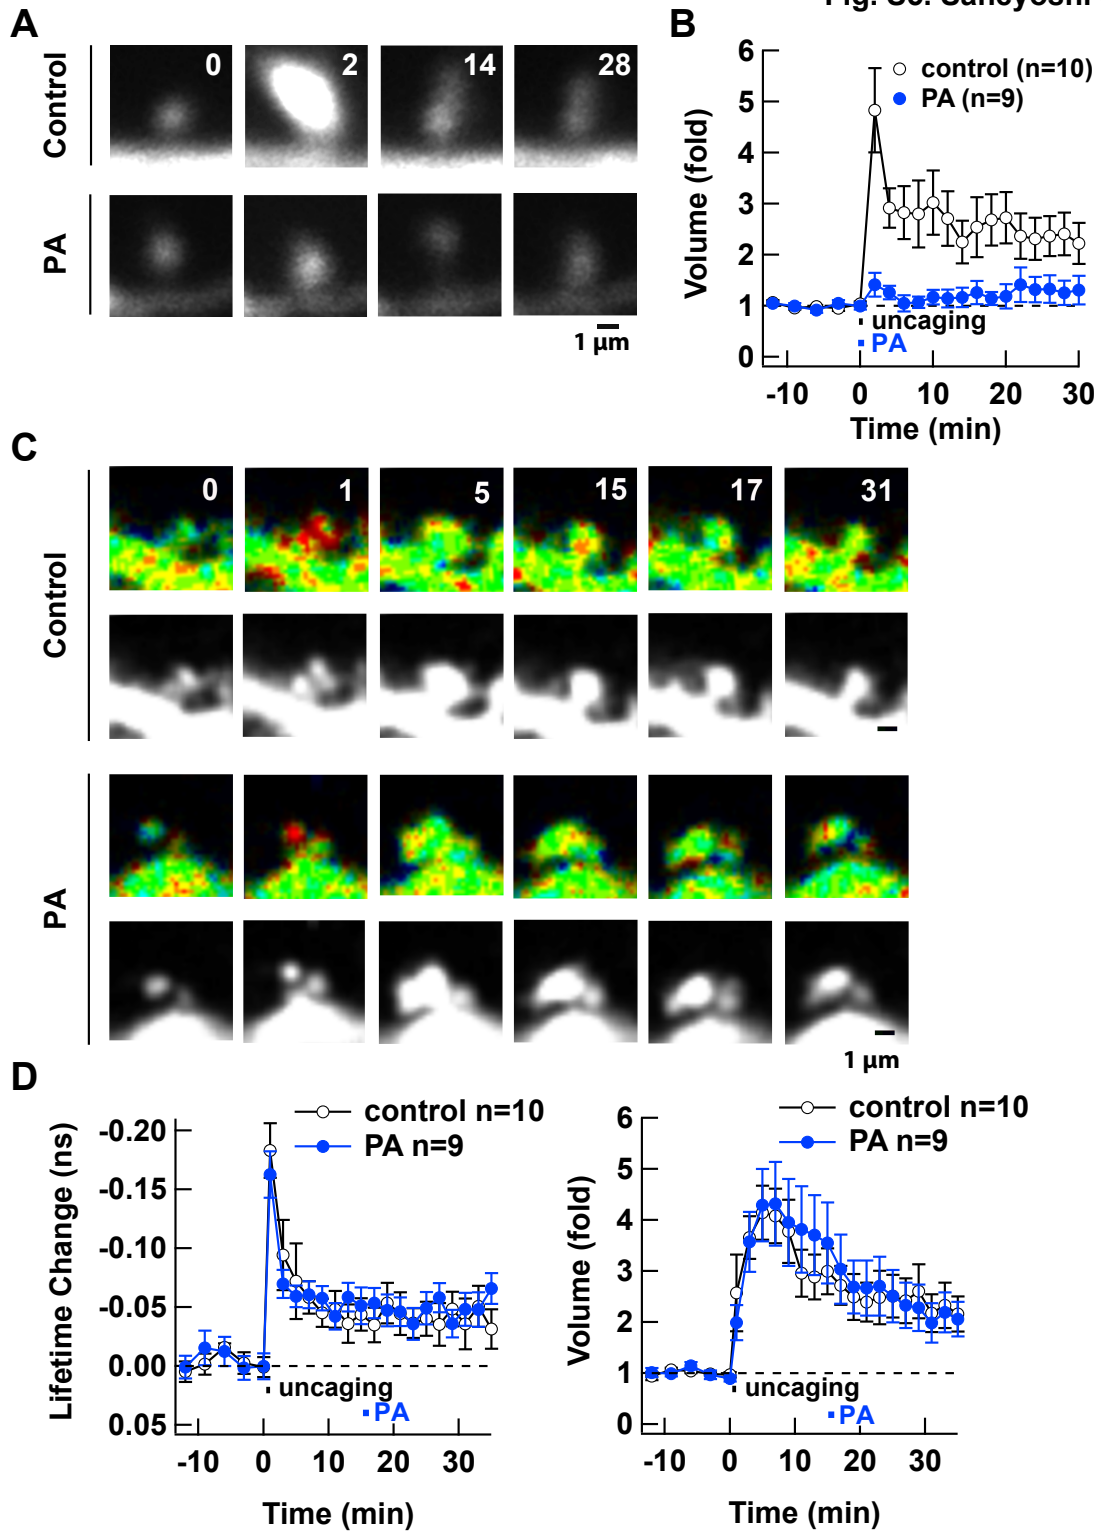

75 **Figure S5, related to Figures 6. paAIP2 was not able to disrupt the Tiam1/CaMKII complex**  
76 **in stimulated spines**

77 A. Sample images of sLTP in neurons in hippocampal organotypic slice culture coexpressing GFP  
78 and mCherry-paAIP2. Neurons were stimulated by uncaging of caged-glutamate using a 720 nm  
79 two-photon laser (uncaging, 2 ms pulses at 1 Hz for 30 sec) without or with simultaneous  
80 photoactivation (PA) of paAIP2 using 473 nm laser (200 ms pulses at 1 Hz for 1 min), which by  
81 itself does not cause uncaging of caged-glutamate (Matsuzaki et al., 2001). Control, without  
82 photoactivation; PA, with photoactivation.

83 B. Summary of the effect of photoactivation of paAIP2 at the same time with uncaging of  
84 glutamate. Spine volume was measured by fluorescent intensity of GFP.

85 C. Representative images of the interaction between Tiam1 and CaMKII with or without  
86 photoactivation of paAIP2 at 15 min after induction of sLTP. Warmer hues indicate more  
87 interaction. The distribution of Tiam1-GFP, as a proxy of structure, is shown (bottom).

88 D. Summary of FRET change (left) and volume (right) from multiple spines.  
89 Data are represented as mean  $\pm$  SEM (B, D).  
90
